- 29 Hughes ME, Waite LJ. Marital biography and health at mid-life. *J Health Soc Behav* 2009;50:344–58.
- 30 Liu H, Umberson DJ. The times they are a changin': marital status and health differentials from 1972 to 2003. *J Health Soc Behav* 2008;49:239–53.
- 31 Tumin D. Does marriage protect health? A birth cohort comparison. *Soc Sci Q* 2018;99:626–43.
- 32 O'Reilly D, Rosato M. Religious affiliation and mortality in Northern Ireland: beyond Catholic and Protestant. *Soc Sci Med* 2008;66:1637–45.
- 33 Hu Y, van Lenthe FJ, Borsboom GJ, et al. Trends in socioeconomic inequalities in self-assessed health in 17 European countries between 1990 and 2010. *J Epidemiol Commun Health* 2016;70:644–52.
- 34 Mackenbach JP, Stirbu I, Roskam AR, et al. Socioeconomic inequalities in health in 22 European countries. *N Engl J Med* 2008;358:2468–81.
- 35 Todd S, Barr S, Roberts M, Passmore AP. Survival in dementia and predictors of mortality: a review. *Int J Geriatr Psychiatry* 2013;28:1109–24.
- 36 Cuijpers P, Vogelzangs N, Twisk J, et al. Comprehensive meta-analysis of excess mortality in depression in the general community versus patients with specific illnesses. *Am J Psychiatry* 2014;171:453–62.
- 37 Saha S, Chant D, McGrath J. A systematic review of mortality in schizophrenia: is the differential mortality gap worsening over time? *Arch Gen Psychiatry* 2007;64:1123–31.
- 38 Tyrer F, McGrother C. Cause-specific mortality and death certificate reporting in adults with moderate to profound intellectual disability. *J Intell Dis Res* 2009;53:898–904.
- 39 Young H, Grundy E, O'Reilly D, Boyle P. Self-rated health and mortality in the UK: results from the first comparative analysis of the England and Wales, Scotland, and Northern Ireland Longitudinal Studies. *Popul Trends* 2010;139:11–36.
- 40 Jylhä M. What is self-rated health and why does it predict mortality? Towards a unified conceptual model. *Soc Sci Med* 2009;69:307–16.

*The European Journal of Public Health*, Vol. 30, No. 3, 578–583

© The Author(s) 2019. Published by Oxford University Press on behalf of the European Public Health Association. All rights reserved.

doi:10.1093/eurpub/ckz202 Advance Access published on 11 November 2019

## Feasibility and acceptability of an intervention for enhancing reintegration in adults with experience of homelessness

Eva C. Sundin <sup>1</sup>, Aleksandra Mrowiec<sup>1</sup>, Graham Bowpitt <sup>1</sup>, Charlotte A. Boatman<sup>1</sup>, A.J. Williams<sup>1</sup>, Mustafa Sarkar<sup>2</sup>, Thom S. Baguley <sup>1</sup>

<sup>1</sup> Department of Psychology, Nottingham Trent University, Nottingham, UK

<sup>2</sup> Department of Sport and Exercise Psychology, Nottingham Trent University, Nottingham, UK

**Correspondence:** Eva C Sundin, Department of Psychology, Nottingham Trent University, 50 Shakespeare Street, Nottingham NG1 4FQ, UK, Tel: +44(0)115 8485590, Fax: +44 (0)115 848 2390, e-mail: eva.sundin@ntu.ac.uk

**Background:** Service centres for homeless adults are potential settings for implementation of reintegration interventions. This study aimed to evaluate (i) the acceptability of a group-based programme among individuals from the broad population of homeless people and (ii) if a future study of its feasibility and acceptability for re-housed homeless people is warranted. **Methods:** Recruiting participants and intervention facilitators from partnering service centres was thought to improve recruitment and retention, cost-effectiveness and social interactions compared to professional-led interventions. Seven adults with experience of homelessness (three females, four males, mean age 39 years, range 18–63) were recruited to participate in the intervention. The research protocol comprised completion pre/post of scales [Recovering Quality of Life questionnaire; Working Alliance Inventory-short form revised (WAI-SR)] and focus groups, and WAI-SR and focus groups after sessions 3 and 6. **Results:** The intervention and research protocols were feasible, with all participants engaging in all sessions, completing all scales and attending all focus groups. The quantitative data demonstrated the feasibility of obtaining practically useful measures of relevant outcomes. In the four focus groups, the intervention received very favourable feedback. **Conclusions:** This study demonstrated initial feasibility and acceptability of an intervention that places minimal burden on infrastructure and promotes user autonomy. This is an important advance as there is increasing recognition that the challenge of reintegration is as much a psychological and social problem as a housing problem. If effective, this style of intervention may serve as a template for future interventions with similar populations.

## Introduction

The devastating experience of life in homelessness can lead to difficulties forming social connections that meet people's basic needs, which in turn impedes reintegration. Reintegration, in the context of homelessness, refers to 'the extent to which formerly homeless people are able to live, work, learn and participate in their communities to the extent that they wish to, and with as many opportunities as other community members' (p. 5).<sup>1</sup> Indeed, objective loneliness, or a limited network of 'friends and acquaintances

that can provide a sense of belonging, of companionship and of being a member of a community' (p. 504),<sup>2</sup> affects well-being across populations.<sup>3</sup> Perceived loneliness is related to the quality rather than quantity of social connections and reduces opportunities to maintain social relationships.<sup>4</sup> In their prospective study of mortality risk, Elovainio et al.<sup>5</sup> reported links between poor social connections and increased mortality risk. Socioeconomic adversity was a significant predictor of the excess mortality risk.

Notwithstanding, socioeconomic adversity is not a homogeneous classification and evidence confirms that people who are homeless

have poorer social connections compared to their housed counterparts.<sup>6</sup> Although poor social connections among the homeless impact negatively on the rate of reintegration,<sup>7</sup> the relationship between social connections and reintegration remains an under-researched topic.<sup>8,9</sup>

People who are homeless have limited access to *health care*.<sup>10</sup> Barriers include competing priorities (hunger, housing), language barriers and lack of trust in health care providers.<sup>11</sup> Hence the development of *specifically* tailored interventions for homeless people, for example, assertive community treatment<sup>12,13</sup> and the St Mungo's LifeWorks.<sup>14</sup> A review of service provision for homeless individuals in 14 European countries concluded that homeless-specific services improved individuals' service engagement.<sup>11</sup> Throughout the western world, Housing First (HF) interventions offer supported housing to chronically homeless individuals.<sup>15</sup> However, as yet only limited evidence suggests that HF enhances reintegration.<sup>1</sup> Psychologically Informed Environment (PIE) is an intervention which targets needs in the broader homeless population through developing hostels into environments which support the psychological needs of service-users.<sup>16</sup> Support for PIE has been presented however some have cautioned about the economic costs associated with implementing PIEs.<sup>1</sup> Summing up, these examples of interventions to combat homelessness show forcibly the need for programmes to enhance reintegration among adults with experience of homelessness.

In preparation of a programme to enhance reintegration, we undertook informal discussions with members of the homeless population and a narrative review of 30 support centres for homeless adults across East Midlands, UK. This initial research confirmed the critical role of social connections for people who are homeless, and that the care providers ideally should 'meet (homeless) people where they are' (p. 69).<sup>17</sup> We identified two support centres, Emmanuel House service centre for homeless adults and Services for Empowerment and Advocacy (SEA) in Nottingham, whose mission is to provide a supportive, inclusive environment for local people with experience of homelessness in their attempts to explore new endeavours.<sup>18–20</sup> In partnership with end-users (service-users, staff/volunteers) at Emmanuel House and SEA, we developed a group-based programme for adults with experience of homelessness. Given that our participants belonged to a vulnerable population, the primary study aim was to evaluate the acceptability of the programme and study procedures for individuals from the general population of homeless people and our ability to deliver them in practice. A second aim was to determine if a future study of the programme's feasibility and acceptability for re-housed homeless people was warranted. We also assessed the feasibility of recruitment approaches, data collection procedures and collection of data, including sample characteristics. A preliminary analysis of participant responses to the programme focusing on description of the data collected, and ability and willingness to complete the measures is included.

## Methods

### Design

The article reports on the *feasibility/acceptability* of the programme, using the UK Medical Research Council (MRC) Framework for complex interventions.<sup>19</sup> The evaluation used a single-arm, pre-test post-test design with seven adults. A small sample was chosen since it was an initial study to examine if we would be able to deliver the programme according to plan, and if the programme is acceptable for people from a vulnerable population whilst statistical inference about outcomes was not a study aim.<sup>20</sup> The developmental phase was completed prior to the current study and is summarized below.

### Programme development

The programme development used a community-centred strategy and was embedded in the individuals' peer and community contexts:<sup>18</sup>

- (i) A review of the literature on interventions for people with experience of homelessness;
- (ii) The review findings guided the development of schedules for focus groups and informal conversations with end-users;
- (iii) Data from the focus groups and informal conversations were used to verify the relevance of the findings from the literature review;
- (iv) The format and content of the programme was developed, guided by the literature review and the data from focus groups and informal conversations;
- (v) The programme's theoretical foundation was drawn from the Behaviour Change Wheel (BCW),<sup>21</sup> which has been used across a broad range of populations, including homeless people<sup>22</sup> and women from ethnic minority groups.<sup>23</sup> The BCW builds on the assumption that for any behaviour-change to occur, the individual concerned must have the *capability* (knowledge and skills), *opportunity* (environmental, social and financial) and *motivation* (automatic and reflective) to enact the behaviour-change. From BCW, we selected interventions that address limited capability and motivation (e.g. learning, enablement and modelling). In addition, the programme was designed to facilitate a working alliance (WA) between participant/s and facilitator/s.<sup>24</sup> WA with its focus on the bond and agreement on tasks and goals between participants and facilitators has been shown to be important for the success of group interventions across a variety of populations.<sup>25</sup> Thirdly, the programme draws on principles of inclusivity<sup>26–28</sup> and an understanding of the dire impact of social isolation on people who are homeless, developed from theories about belonging as a *fundamental* human need.<sup>29</sup>

### Programme description

The programme provided opportunity to strengthen motivation and capability to change self-selected behaviours and to work on barriers to the chosen behaviour-change, using three intervention functions; education, training and modelling. Therefore, the programme side-stepped the task to decide which behaviour/s should be targeted, based on the assumption that the participant would have better opportunity to achieve behaviour-change if the behaviour/s were self-selected.<sup>30</sup> The group-format aimed to provide opportunity to learn from both facilitators and peers.

### Programme format and content

The programme comprised eight 2-h sessions, spread over 4 weeks, where participants were invited to discuss their selected problem-behaviour in the context of everyday experiences:

- Session 1: What are some unwanted mood states (low mood, anxiety, inability to be happy/interested); experience of lacking something (willpower, ability to make plans), and unwanted behaviour (aggression, submissiveness, withdrawal from others)? Agreement on which behaviour/s each participant will work on changing during the programme.
- Session 2: What are some thoughts, feelings and behaviour that trigger unwanted mood states or behaviours?
- Session 3: Noticing triggers of personal risk factors (e.g. feeling helpless, lonely, using avoidant behaviour).
- Session 4: Exploring consequences of thoughts, feelings and behaviour that trigger risk factors—short and long term.
- Session 5: Developing techniques to manage thoughts, feelings and behaviour that trigger risk factors.

Session 6: Developing a personal toolbox to manage thoughts, feelings and behaviour that trigger risk factors.

Session 7: Sharing general and specific learnings from developing a personal toolbox in the group.

Session 8: Exploring 'How would I react?' Practicing making smart choices in difficult situations.

## Procedures

### Ethics

Ethical approval was granted from Nottingham Trent University's College of Business, Law and Social Sciences Research Ethics Committee.

### Sample recruitment

Participants and facilitators were recruited from partnering service centres. This was thought to improve recruitment rate and retention, cost-effectiveness and social interactions when compared to professional-led interventions. Eligible individuals were adults (18 years-) with experience of homelessness who were able to read and understand English at a level that enabled participation in the programme and understanding the participant information, and who showed interest in participating. There were no additional exclusion criteria because inclusivity is central to the values of the research aims. Those who signed an informed consent form were enrolled. Facilitators were recruited among staff and individuals with experience of homelessness at partnering service centres.<sup>31,32</sup> Before the programme delivery, the facilitators received three training workshops, which covered, for example, enhancement of rapport with participants and finding a balance between intervention tasks and the group's well-being. Throughout the delivery, the facilitators were in regular contact with its main developer (the first author), which ensured that the programme was delivered with a high level of fidelity. As recommended when researching hard-to-reach populations, participants and peer facilitators received a financial incentive upon completion of questionnaires and focus groups.<sup>33</sup>

### Sample characteristics

The study recruited seven adults, mean age 39 years (SD = 12.8, ranging from 18 to 63), with experience of homelessness (three females, four males) to participate in the programme. All participants reported unstable housing, unemployment, few social contacts and experience of traumatic event/s. Six participants disclosed poor mental health, two disclosed drug dependencies and a single participant reported gambling problems, childhood abuse and domestic violence, respectively.

### Facilitators

Our provisional plan to use four facilitators (two staff, two peers) was exceeded by one in this study where three (two females, one male) were staff and two males had experience of homelessness.

### Feasibility/acceptability evaluation

Feasibility was assessed by success of proposed recruitment approaches; whether the programme (adherence; number of sessions attended) and research protocol (perceived burden of the research elements; level of missing data and dropout) were delivered as designed. Acceptability for participants was assessed pre/post and after sessions 3 and 6.

### Data collection

Recovering Quality of Life questionnaire (REQOL);<sup>34</sup> Working Alliance Inventory-short form revised (WAI-SR),<sup>35</sup> and focus groups were administered pre/post. WAI-SR and focus groups

were administered after sessions 3 and 6. The 10-question REQOL evaluates the recovery process in individuals with mental health problems. The 12-question WAI-SR measures WA, defined as agreement on the goals, tasks and bond of the treatment. REQOL and WAI-SR have adequate psychometric properties.<sup>34,36</sup>

### Quantitative analysis

Questionnaire data were analysed using descriptive statistics. To help reveal whether measurable behaviour-change was potentially present following the programme, we calculated difference-adjusted within-subjects confidence intervals for the overall mean for each outcome measure.<sup>37</sup>

### Qualitative analysis

To assess acceptability, participants took part in focus groups before and after the programme, and after sessions 3 and 6. The focus group sessions were transcribed and analysed using thematic analysis.

## Results

### Feasibility

Seven individuals were invited, consented and attended all sessions. In the initial session, all participants jointly agreed to work on changing two problem-behaviours: exercise more controlled behaviours in conflicts, show more assertive behaviour. The research protocol (questionnaires and focus groups) were delivered as designed with minimal level of missing data (<1%).

### Acceptability

#### Quantitative analysis

Although the patterns of change on all scores were noisy (as would be expected in small samples), the data were broadly consistent with gradual change over time—particularly on Goal, Task and REQOL. Although there was evidence of positive change for Bond, the pattern was more variable. See [figure 1](#).

The mean pre-post change for Task was 5.3, 95% CI [2.2, 8.3]. For Goal, it was 3.57, 95% CI [1.5, 5.6] and for REQOL, it was 4.86, 95% CI [0.5, 9.2]. For Bond, the mean change was 1.86, 95% CI [-0.2, 4.0].

#### Qualitative analysis

Two themes emerged from analysing the four focus groups: 'Positive changes' (subthemes: Practical skills attainment; Relationship skills attainment) and 'Little to no change'. Here we report on the themes, illustrated with verbatim quotes. Each quote is followed by identifications of the participant and session (e.g. Participant 3 in the 2nd focus group = P3, FG2).

*Positive changes: Practical skills attainment.* Participants perceived that during participating in the programme they learned new techniques of managing difficult experiences. The following quote illustrates how P3 feels that s/he had learned to handle their temper better:

Before if someone said something bad to me I'd probably lash out...but now I don't. I tend to let a few things just go over my head. (P3, FG4)

In this quote, P3 explains that the programme had helped them to manage their behaviour differently when feeling overwhelmed. P3 perceives that, following the programme, s/he can both distance themselves ('I just walk away') and 'talk about things, instead of arguing' (P3, PG4). Others recognized that they 'tended to be calmer' (P9, FG4) when they 'stepped back and evaluated it [the problem]' (P4, FG4). Other participants perceived that they acted more

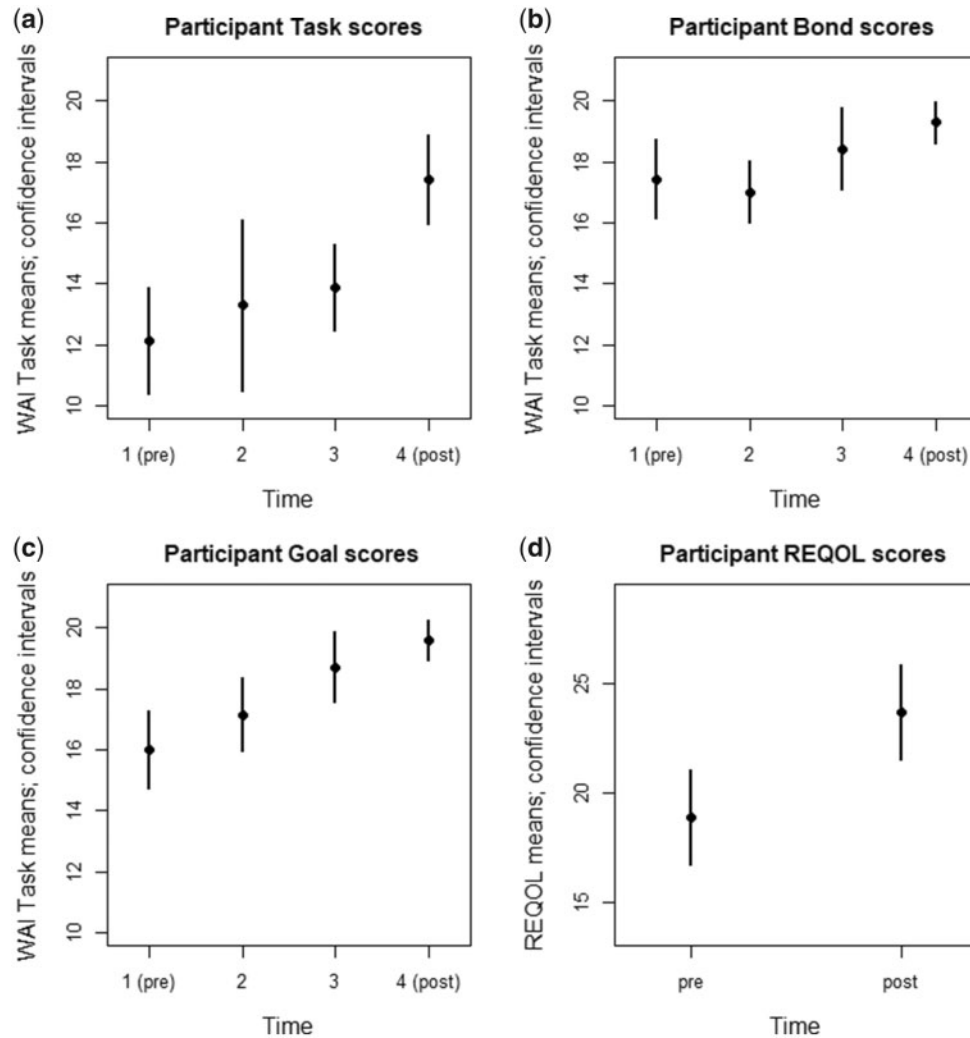

**Figure 1** Participant scores on the four outcome measures over time. Error bars are difference-adjusted within-subjects 95% CIs<sup>37</sup>

assertively after the programme. In the quote below, P5 explains how s/he made use of what s/he had learnt from the programme ['course'].

Before the course, I was avoiding that [name] who I live with, because I thought best to keep out of her way because she'll hit me. But now, not only I don't avoid her. I make a point, not getting in her face exactly, but being about. (P5, FG4)

In this quote, P5 discusses what s/he perceives to be an important gain from the programme; s/he feels and acts in a confident way when interacting with people whom she in the past had gone to great length to avoid.

The second subtheme, relationship skills attainment, illustrates participants' perceptions of having enhanced their capacity to build relationships. In the quote below, P9 succinctly states that the programme had a profound impact on their life.

I didn't have any friends before I started here. And now I've made loads of friends. (P9, FG2)

Several participants explain that the invitation to participate in the programme was important to them: 'We do feel more worthwhile, since you've been asked to do a project you don't feel worthless as much.' (P5, FG4) This quote illustrates a change that several participants highlighted; participation in the programme had kindled a sense of belonging. 'Makes you feel human again. Makes you feel like you're part of something.' (P4, FG2)

Several participants emphasize that being able to share in the group led to being more able to trust people outside the group. The quote from P5 below illustrates how participants perceive that they have started a change process.

I've learnt to trust people a bit more, not 100% but I'm getting there. (P5, FG2)

The theme 'Little to no change' showed that participants perceived that their enhanced skills and capacities had limitations. Participants 'still feel lonely' (P9, FG4) and the contrast between feeling safe during a session and when stepping outside can be daunting: 'as soon as we come out of the room, we build the barriers back up' (P3, FG4).

In addition, whilst the programme has enabled participants to build skills and a sense of belonging, they have only started to implement these changes in their everyday life 'I'm still finding it hard to cope with a couple of things...keep putting them off, thinking they're going to go away' (P9, FG4). Many participants also identify important aspects of their life that remain unchanged: 'It will help us yeah and it will affect how we think of things but it's not going to affect anything on the streets'. (P4, FG2)

## Discussion

The contribution of this study is to provide a description of the development and use of a group-based programme to support re-integration in adults with experience of homelessness. The findings



indicated that the programme is acceptable for individuals from the broad population of homeless people. The consistent positive reports about the programme from adults who were unstably housed suggest that a future study of the programme's feasibility and acceptability for re-housed homeless people is warranted.

Our literature review revealed that the field of interventions that enhance reintegration of homeless individuals is not well developed.<sup>8,9</sup> This intervention builds on the existing, inherent relationships between service centres in the community and adults with experience of homelessness. The advantages of involving former homeless individuals as facilitators must be highlighted. Their skills and experiences proved valuable in developing a rapport with participants, exploring participants' views and needs, and assist them in their change process.<sup>32</sup>

At baseline, participants were very motivated to participate. Overall, the results from the analysis of the questionnaire ratings suggest that participants found the programme acceptable. In the focus groups, the programme received very favourable comments regarding usefulness when learning to address the agreed behaviour problems: exercise more controlled behaviour in situations of conflict and adopt a more assertive attitude. The programme and research protocol were feasible, with all participants engaging in all sessions, completing all scales and attending all focus groups. The data also demonstrate the feasibility of obtaining practically useful measures of relevant outcomes.

The study has several limitations. This was an initial study of the feasibility of the programme procedures and research protocol, and its acceptability for individuals who are homeless or unstably housed. In similar to many other initial feasibility studies,<sup>38,39</sup> this study used a small sample. A second limitation is that the study was conducted in a single support centre. A natural next step in developing the programme would be to assess the programme's feasibility and acceptability for individuals with prior experience of homelessness who are stably housed, using a bigger sample recruited from several centres. Limitations aside, the programme addresses an expressed need for an evidence-based, accessible and low-cost intervention to enhance reintegration after homelessness.<sup>40</sup> In so far, as few staff at services for the homeless are specifically trained in enhancing reintegration, the programme offers a template, adaptable to local situations.

## Conclusion

To our knowledge, this is the first study to examine the feasibility and acceptability of a programme that aims to enhance reintegration of adults with experience of homelessness. Applying an inclusive, user-centred approach was essential to generating a programme that has potential to address challenges that people with experience of homelessness face when attempting to exit homelessness.<sup>28–30</sup> The findings underscore the importance of fostering relationship capacity, perceived well-being and functioning in interventions for individuals with experience of homeless in the years to come.

## Acknowledgements

We wish to thank Dr Lisa Ball for thoughtful discussion of these issues. Our thanks also go to two anonymous reviewers for valuable comments on previous versions of this article.

## Funding

Internal funding was provided by Department of Psychology, Nottingham Trent University limited to vouchers to participants and peer facilitators.

*Conflicts of interest:* None declared.

## Keypoints

- Informal research showed that homeless adults in Nottingham perceived that psychological and social problems challenged community integration.
- While we know that housing interventions can yield housing stability and well-being such interventions are ineffective in enhancing community reintegration.
- After participating in a new intervention which aims to enhance community reintegration, a cohort of homeless adults who were homeless or unstably housed reported that they found the intervention acceptable, useful and helpful.
- Interventions that have a potential to enhance community reintegration should be integrated into the service provision and offered to homeless adults who are homeless or unstably/stably housed.
- Interventions that have a potential to enhance community reintegration of homeless adults should be identified, and feasibility/acceptability be assessed locally in various subsamples in the homelessness population, followed by assessment of the effectiveness of promising interventions.

## References

- 1 Quilgars D, Pleave N. Housing first and social integration: a realistic aim? *Soc Incl* 2016;4:5–15.
- 2 Weiss RS. *Loneliness: The Experience of Emotional and Social Isolation*. Cambridge: MIT Press, 1973.
- 3 Berkman LF, Glass T. Social integration, social networks, social support, and health. *Soc Epidemiol* 2000;9:137–73.
- 4 Cacioppo JT, Hawkley LC. Perceived social isolation and cognition. *Trends Cogn Sci* 2009;13:447–54.
- 5 Elovainio M, Hakulinen C, Pulkki-Råback L, et al. Contribution of risk factors to excess mortality in isolated and lonely individuals: an analysis of data from the UK Biobank cohort study. *Lancet Public Health* 2017;2:e260–6.
- 6 Epel ES, Bandura A, Zimbardo PG. Escaping homelessness: the influences of self-efficacy and time perspective on coping with homelessness 1. *J Appl Social Psychol* 1999;29:575–96.
- 7 Bower M, Conroy E, Perz J. Australian homeless persons' experiences of social connectedness, isolation and loneliness. *Health Soc Care Community* 2018;26:e241–8.
- 8 Crane M, Warnes AM, Coward S. Preparing homeless people for independent living and its influence on resettlement outcomes. *Eur J Homelessness* 2012;6:17–45.
- 9 Tsai J, Mares AS, Rosenheck RA. Does housing chronically homeless adults lead to social integration? *Psychiatr Serv* 2012;63:427–34.
- 10 Keogh C, O'Brien KK, Hoban A, et al. Health and use of health services of people who are homeless and at risk of homelessness who receive free primary health care in Dublin. *BMC Health Serv Res* 2015;15:58.
- 11 Canavan R, Barry MM, Matanov A, Barros H, et al. Service provision and barriers to care for homeless people with mental health problems across 14 European capital cities. *BMC Health Serv Res* 2012;12:222.
- 12 Harvey C, Killaspy H, Martino S, et al. A comparison of the implementation of assertive community treatment in Melbourne, Australia and London, England. *Epidemiol Psychiatr Sci* 2011;20:151–61.
- 13 Wright C, Burns T, James P, et al. Assertive outreach teams in London: models of operation: Pan-London Assertive Outreach Study, part 1. *Br J Psychiatry* 2003;183:132–8.
- 14 Cocksell P. Homelessness and mental health: adding clinical mental health interventions to existing social ones can greatly enhance positive outcomes. *J Public Mental Health* 2011;10:88–98.
- 15 Baxter AJ, Tweed EJ, Katikireddi SV, Thomson H. Effects of Housing First approaches on health and wellbeing of adults who are homeless or at risk of homelessness: systematic review and meta-analysis of randomised controlled trials. *J Epidemiol Community Health* 2019;73:379–87.
- 16 Phipps C, Seager M, Murphy L, Barker C. Psychologically informed environments for homeless people: resident and staff experiences. *Hous Care Support* 2017;20:29–42.

- 17 Olivet J, Bassuk E, Elstad E, et al. Outreach and engagement in homeless services: a review of the literature. *Open Health Serv Policy J* 2010;3:53–70.
- 18 Johnsen S, Cloke P, May J. Transitory spaces of care: serving homeless people on the street. *Health Place* 2005;11:232–6.
- 19 Craig P, Dieppe P, Macintyre S, et al. Developing and evaluating complex interventions: the new Medical Research Council guidance. *BMJ* 2008;337:a1655–61.
- 20 Moore CG, Carter RE, Nietert PJ, Stewart PW. Recommendations for planning pilot studies in clinical and translational research. *Clin Transl Sci* 2011;4:332–7.
- 21 Michie S, Van Stralen MM, West R. The behaviour change wheel: a new method for characterising and designing behaviour change interventions. *Implement Sci* 2011;6:42–53.
- 22 Paudyal V, MacLure K, Buchanan C, et al. 'When you are homeless, you are not thinking about your medication, but your food, shelter or heat for the night': behavioural determinants of homeless patients' adherence to prescribed medicines. *Public Health* 2017;148:1–8.
- 23 Handley MA, Harleman E, Gonzalez-Mendez E, et al. Applying the COM-B model to creation of an IT-enabled health coaching and resource linkage program for low-income Latina moms with recent gestational diabetes: the STAR MAMA program. *Implement Sci* 2016;11:73.
- 24 Bordin ES. The generalizability of the psychoanalytic concept of the working alliance. *Psychother Theory Res Pract* 1979;16:252–60.
- 25 Henry WP, Strupp HH. The therapeutic alliance as interpersonal process. In: AO Horvath, LS Greenberg, editors. *Wiley Series on Personality Processes. The Working Alliance: Theory, Research, and Practice*. Oxford, England: John Wiley & Sons, 1994: 51–84.
- 26 Bowpitt G, Dwyer P, Sundin E, Weinstein M. The support priorities of multiply excluded homeless people and their compatibility with support agency agendas - new research into multiple exclusion homelessness. *Hous Care Support* 2011;14: 31–2.
- 27 Dwyer P, Bowpitt G, Sundin E, Weinstein M. Rights, responsibilities and refusals: homelessness policy and the exclusion of single homeless people with complex needs. *Crit Soc Policy* 2015;35:3–23.
- 28 Dwyer P, Bowpitt G, Sundin E, Weinstein M. Places of sanctuary for 'the undeserving'? Homeless people's day centres and the problem of conditionality. *Br J Soc Work* 2013;44:1251–67.
- 29 Baumeister RF, Leary MR. The need to belong: desire for interpersonal attachments as a fundamental human motivation. *Psychol Bull* 1995;117:497–529.
- 30 Aujoulat I, d'Hoore W, Deccache A. Patient empowerment in theory and practice: polysemy or cacophony? *Patient Educ Couns* 2007;66:13–20.
- 31 Elliott E, Watson AJ, Harries U. Harnessing expertise: involving peer interviewers in qualitative research with hard-to-reach populations. *Health Expect* 2002;5:172–8.
- 32 Salzer MS. Consumer-delivered services as a best practice in mental health care delivery and the development of practice guidelines: mental Health Association of Southeastern Pennsylvania Best Practices Team Philadelphia. *Psychiatr Rehabil Skills* 2002;6:355–82.
- 33 Heckathorn DD. Respondent-driven sampling: a new approach to the study of hidden populations. *Soc Problems* 1997;44:174–99.
- 34 Keetharuth AD, Brazier J, Connell J, et al. Recovering Quality of Life (ReQoL): a new generic self-reported outcome measure for use with people experiencing mental health difficulties. *Br J Psychiatry* 2018;212:42–9.
- 35 Hatcher RL, Gillaspay JA. Development and validation of a revised short version of the Working Alliance Inventory. *Psychother Res* 2006;16:12.
- 36 Munder T, Wilmers F, Leonhart R, et al. Working Alliance Inventory-Short Revised (WAI-SR): psychometric properties in outpatients and inpatients. *Clin Psychol Psychother* 2010;17:231–9.
- 37 Baguley T. Calculating and graphing within-subject confidence intervals for ANOVA. *Behav Res Methods* 2012;44:158–75.
- 38 Bormann JE, Thorp S, Wetherell JL, Golshan S. A spiritually based group intervention for combat veterans with posttraumatic stress disorder: feasibility study. *J Holist Nurs* 2008;26:109–16.
- 39 Holtz B, Whitten P. Managing asthma with mobile phones: a feasibility study. *Telemed J E Health* 2009;15:907–9.
- 40 Slockers MT, Nusselder WJ, Rietjens J, Van Beeck EF. Unnatural death: a major but largely preventable cause-of-death among homeless people? *Eur J Public Health* 2018;28:248–52.
